# Supplementary material
Source: Springer Nature journal article supplement (https://www.springermedizin.de/resource/supplementary/12969_2008_365_MOESM2_ESM.pdf/9592880)
Supplement: MOESM2 [file 9592880]

**Table 2. Intraobserver variation (observer I) in US measurements of articular cartilage thickness in 17 healthy children**

| Observer I   |                                                         |          |                                        |                                                    |                                |
|--------------|---------------------------------------------------------|----------|----------------------------------------|----------------------------------------------------|--------------------------------|
|              | Systematic Variation <sup>1</sup><br>(Day I and Day II) |          | Random Variation <sup>2</sup>          |                                                    | Total variation                |
|              | Mean difference <sup>3</sup> in mm                      | <i>p</i> | SD* <sup>“within child”</sup><br>in mm | SD <sup>°</sup> <sup>“within joint”</sup><br>in mm | SD (CV <sup>4</sup> )<br>in mm |
| <b>Knee</b>  | 0.01                                                    | 0.916    | 0.07                                   | 0.20                                               | 0.21 (5.9%)                    |
| <b>Ankle</b> | 0.03                                                    | 0.623    | 0.16                                   | 0.14                                               | 0.21 (19.9%)                   |
| <b>Wrist</b> | 0.08                                                    | 0.707    | 0.58                                   | 0.35                                               | 0.68 (34.1%)                   |
| <b>MCP</b>   | 0.04                                                    | 0.294    | 0.02                                   | 0.15                                               | 0.15 (12.9%)                   |
| <b>PIP</b>   | -0.05                                                   | 0.316    | 0.12                                   | 0.12                                               | 0.17 (25.8%)                   |

1: Two weeks between the first a second measurement of cartilage thickness. <sup>2</sup>Random variation (e.g. biological variation within children) <sup>3</sup>Difference between cartilage thickness measurement day I and day II in mm. \*SD=Standard deviation within child, refers to the variation in SD in mm between the right and left extremity <sup>°</sup>SD=Standard deviation within joint, refers to the SD in mm between observers within the same side extremity <sup>4</sup>Coefficient of variation is calculated from the relative differences of measurements (CV=SD/mean x 100)
